# Supplementary material for: The Preeclamptic Environment Promotes the Activation of Transcription Factor Kappa B by P53/RSK1 Complex in a HTR8/SVneo Trophoblastic Cell Line
Source: MDPI journal article supplement (doi:10.3390/ijms221910200), 2021-09-22
Supplement: s1 [file s1]

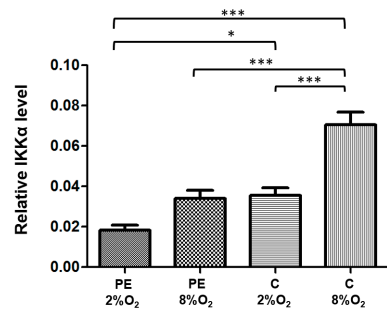

a

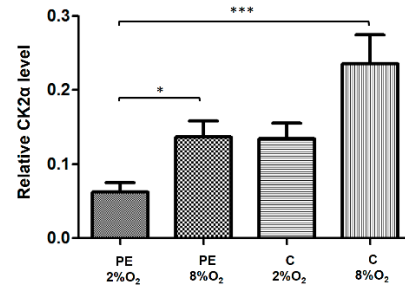

b

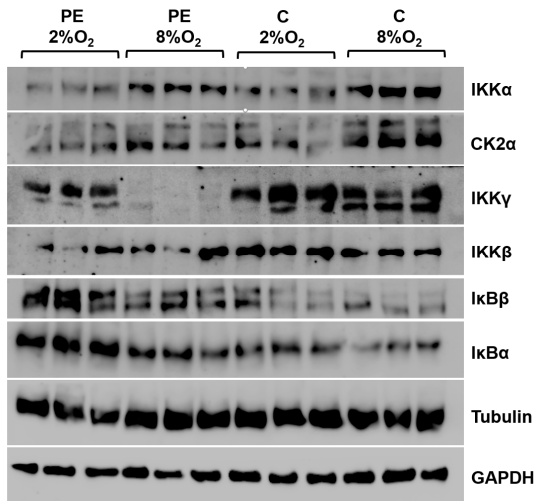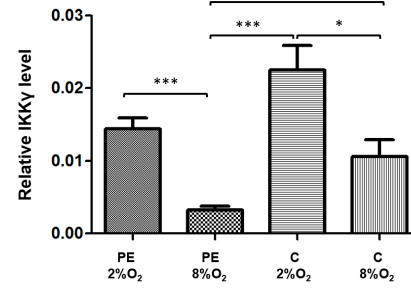

c

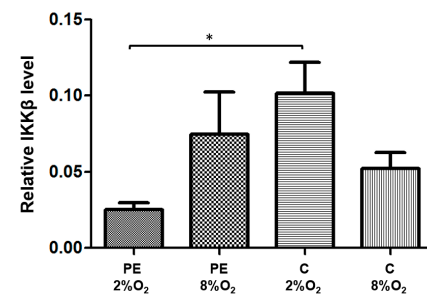

d

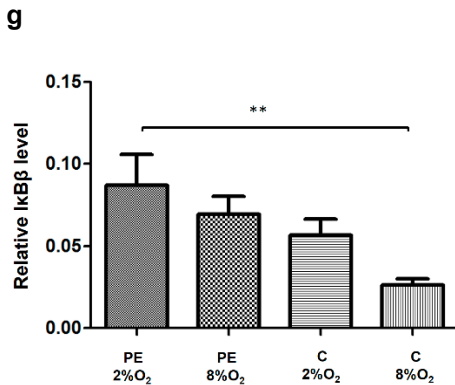

f

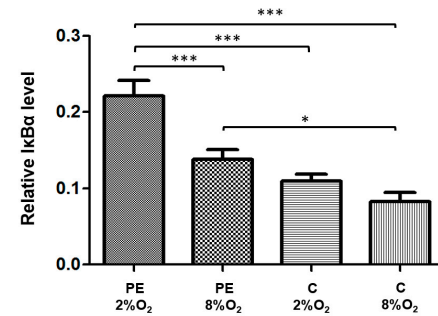

e

**SI Figure S1** Western blot results. Comparison of relative levels of NFκB activators: IKKα (a), CK2α (b), IKKγ (c), IKKβ (d) and NFκB inhibitors: IκBα (e), IκBβ (f) between HTR8/SVneo cells cultured in hypoxia (2%O<sub>2</sub>) and normoxia (8%O<sub>2</sub>) in medium supplemented by 1% of serum from preeclamptic (PE) or normotensive (C) women. The relative levels were calculated to reference proteins: GAPDH and Tubulin. The Western blot membranes present the studied proteins (g). Data are presented as mean ± SEM, p-value calculated by ANOVA with the Bonferroni *post hoc* test or Kruskal-Wallis with Dunn's *post hoc* test, depending the data distribution. \*p<0.05; \*\*p<0.01, \*\*\*p<0.001

**Table S1.** The clinical characteristics of the women from whom the blood samples were obtained for the stimulation of HTR8/SVneo cell line

| Parameters                                                   | Study group<br>(preeclamptic pregnant women)<br>N = 17 | Control group<br>(normotensive pregnant women)<br>N=17 | p     |
|--------------------------------------------------------------|--------------------------------------------------------|--------------------------------------------------------|-------|
| Maternal age<br>at the time of delivery (years) <sup>2</sup> | 32±4.2                                                 | 33±4.5                                                 | 0.559 |
| WBC (10 <sup>3</sup> /ul) <sup>1</sup>                       | 9.9 (6.9-14.3)                                         | 9.6 (8.0-14.8)                                         | 0.939 |
| RBC (10 <sup>6</sup> /ul) <sup>1</sup>                       | 4.1 (3.8-4.6)                                          | 4.1 (3.9-4.7)                                          | 0.756 |
| HB (g/dl) <sup>2</sup>                                       | 12.3±1                                                 | 12.4±1.2                                               | 0.811 |
| HCT (%) <sup>2</sup>                                         | 35±2.4                                                 | 35±2.8                                                 | 0.845 |
| MCV (fl) <sup>2</sup>                                        | 85.1±3.2                                               | 86.4±5.1                                               | 0.368 |
| MCHC (g/dl) <sup>1</sup>                                     | 34.8 (32.7-36.0)                                       | 34.6 (33.3-36.1)                                       | 0.629 |
| PLT (10 <sup>3</sup> /ul) <sup>2</sup>                       | 193±56                                                 | 221±55                                                 | 0.156 |
| BMI (kg/m <sup>2</sup> ) <sup>2</sup>                        | 26±3                                                   | 23±3                                                   | 0.017 |
| Newborn weight (g) <sup>2</sup>                              | 2484±635                                               | 3214±395                                               | 0.003 |
| Newborn length (cm) <sup>2</sup>                             | 50±4                                                   | 54±3                                                   | 0.006 |
| Week of delivery (week) <sup>1</sup>                         | 37 (34-39)                                             | 38 (36-39)                                             | 0.117 |
| Primiparous n (%) <sup>3</sup>                               | 7 (41%)                                                | 3 (18%)                                                | 0.258 |
| History of miscarriage n (%) <sup>3</sup>                    | 4 (23%)                                                | 8 (47%)                                                | 0.282 |
| Male sex of the fetus n (%) <sup>3</sup>                     | 8 (47%)                                                | 7 (41%)                                                | 1.000 |

Legend: BMI, body mass index; WBC, white blood cells; RBC, red blood cells; HB, hemoglobin concentration; HCT, hematocrit; MCV, mean corpuscular volume; MCHC, mean corpuscular hemoglobin concentration; PLT, platelets; kg/m<sup>2</sup>, kilograms/meter square; µl, microliter; g/dl, grams/deciliter; %, percent; fl, femtoliter; g, grams; cm, centimeter; n, number of cases; <sup>1</sup> non-normal distributed data presented as median and 10-90 percentile range, p value calculated by the Mann–Whitney U-test; <sup>2</sup> normal distributed data presented as mean±standard deviation, p-value calculated by Student's t-test; <sup>3</sup> categorical data, p value calculated by chi2 with Yates correction test. The p-value <0.05 was considered as significant for all tests.
